# Supplementary material for: Urgent Outpatient Care Following Mental Health ED Visits: A Population-Based Study
Source: Atypon-hosted journal article supplement (doi:10.1176/appi.ps.201900466), 2020-02-24
Supplement: appi.ps.201900466.ds001.pdf [file appi.ps.201900466.ds001.pdf]

## Urgent outpatient care following mental health ED visits – Online Supplement

**Appendix A.** Data sources used for this study (all accessed through ICES, Toronto, Canada)

| <b>Name</b>                                                                      | <b>Description</b>                        |
|----------------------------------------------------------------------------------|-------------------------------------------|
| Registered Persons Database (RPDB)                                               | Demographics, linkage to vital statistics |
| National Ambulatory Care Reporting System (NACRS)                                | Emergency department data                 |
| Ontario Health Insurance Plan (OHIP)                                             | Physician billings, including diagnosis   |
| Ontario Mental Health Reporting System (OMHRS)                                   | Psychiatric hospitalizations              |
| Canadian Institutes of Health Information Discharge Abstract Database (CIHI-DAD) | Non-psychiatric hospitalizations          |

**Appendix B.** Cohort creation

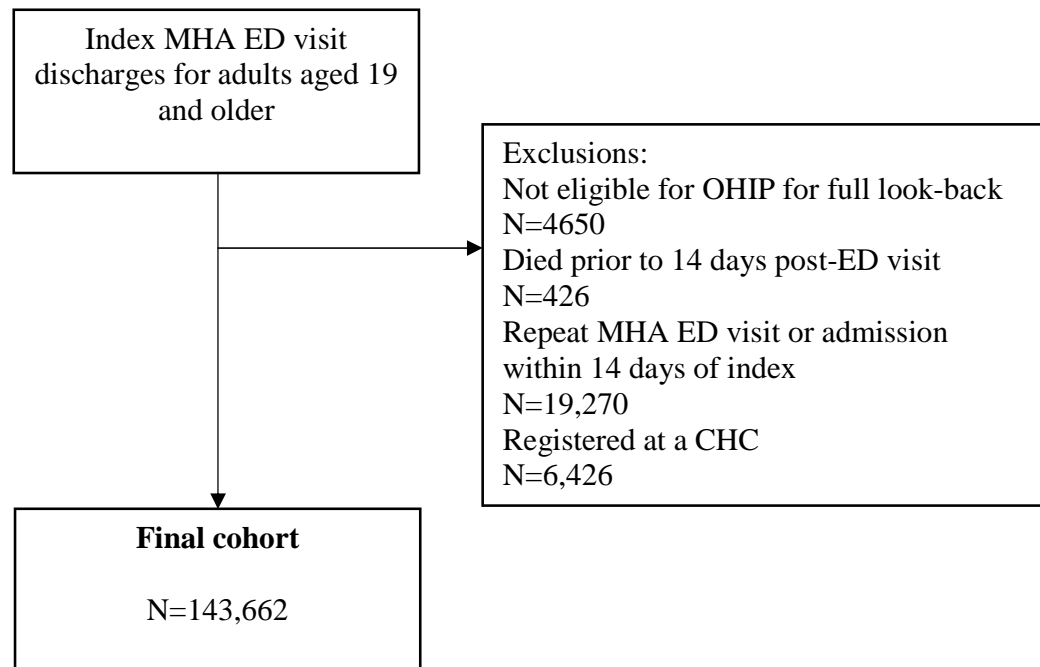

Urgent outpatient care following mental health ED visits – Online Supplement

**Appendix C.** Baseline characteristics for the cohort of adults age 19 and over who were discharged home following a psychiatric ED visit (2010-2012), overall and categorized by primary diagnostic category (substance use disorder, SUD or non-substance use disorders, non-SUD) at the index ED visit. Non-SUD are further specified for specific diagnoses at the index ED visit (schizophrenia, bipolar disorder, and major depressive disorder, MDD).

| Variable                                             | Overall<br>N=143,662 | SUD and non-SUD |                          | Select non-SUD diagnoses |                               |                 |
|------------------------------------------------------|----------------------|-----------------|--------------------------|--------------------------|-------------------------------|-----------------|
|                                                      |                      | SUD<br>N=31,592 | All non-SUD<br>N=112,070 | Schizophrenia<br>N=4765  | Bipolar<br>disorder<br>N=2222 | MDD<br>N=17,643 |
| <b><i>Sociodemographics</i></b>                      |                      |                 |                          |                          |                               |                 |
| Age, mean ± SD                                       | 40.8 ± 17.9          | 38.1 ± 16.7     | 41.5 ± 18.2              | 42.37 ± 15.67            | 40.04 ± 14.47                 | 40.07 ± 16.55   |
| Female, n (%)                                        | 73,588 (51.2)        | 11,200 (35.5)   | 62,388 (55.7)            | 1,762 (37.0%)            | 1,279 (57.6)                  | 10,134 (57.4)   |
| Income quintile, n (%)*                              |                      |                 |                          |                          |                               |                 |
| 1 (lowest)                                           | 39,485 (27.5)        | 9,101 (28.8)    | 30,384 (27.1)            | 1,693 (35.5)             | 645 (29.0)                    | 4,715 (26.7)    |
| 2                                                    | 30,580 (21.3)        | 6,532 (20.7)    | 24,048 (21.5)            | 1,037 (21.8)             | 531 (23.9)                    | 3,747 (21.2)    |
| 3                                                    | 26,035 (18.1)        | 5,518 (17.5)    | 20,517 (18.3)            | 763 (16.0)               | 359 (16.2)                    | 3,265 (18.5)    |
| 4                                                    | 24,464 (17.0)        | 5,140 (16.3)    | 19,324 (17.2)            | 678 (14.2)               | 352 (15.8)                    | 3,078 (17.4)    |
| 5 (highest)                                          | 21,845 (15.2)        | 4,880 (15.4)    | 16,965 (15.1)            | 550 (11.5)               | 328 (14.8)                    | 2,733 (15.5)    |
| Missing                                              | 1,253 (0.9)          | 421 (1.3)       | 832 (0.7)                | 44 (0.9)                 | 7 (0.3)                       | 105 (0.6)       |
| Rural (<10,000 inhabitants), n (%)                   | 22,932 (16.0)        | 3,867 (12.3)    | 19,065 (17.0)            | 424 (8.9)                | 286 (12.9)                    | 2,907 (16.5)    |
| <b><i>Comorbidity</i></b>                            |                      |                 |                          |                          |                               |                 |
| Aggregated Clinical Groups (14), n(%)                |                      |                 |                          |                          |                               |                 |
| 0                                                    | 2,133 (1.5)          | 891 (2.8)       | 1,242 (1.1)              | 51 (1.1)                 | 9 (0.4)                       | 130 (0.7)       |
| 1-4                                                  | 95,804 (66.7)        | 22,996 (72.8)   | 72,808 (65.0)            | 3,424 (71.9)             | 1,485 (66.8)                  | 11,774 (66.7)   |
| ≥5                                                   | 45,725 (31.8)        | 7,705 (24.4)    | 38,020 (33.9)            | 1,290 (27.0)             | 728 (32.8)                    | 5,739 (32.5)    |
| <b><i>Primary care enrolment</i></b>                 |                      |                 |                          |                          |                               |                 |
| Primary care enrolment, n(%)                         |                      |                 |                          |                          |                               |                 |
| Capitation                                           | 63,213 (44.0)        | 12,731 (40.3%)  | 50,482 (45.0)            | 1,639 (34.4)             | 999 (45.0)                    | 7,998 (45.3)    |
| Enhanced fee-for-service                             | 52,793 (36.7)        | 11,669 (36.9)   | 41,124 (36.7)            | 1,960 (41.1)             | 852 (38.3)                    | 6,471 (36.7)    |
| Non enrollment                                       | 7,097 (4.9)          | 2,470 (7.8)     | 4,627 (4.1)              | 339 (7.1)                | 68 (3.1)                      | 653 (3.7)       |
| Other models                                         | 20,559 (14.3)        | 4,722 (14.9)    | 15,837 (14.1)            | 827 (17.4)               | 303 (13.6)                    | 2,521 (14.3)    |
| <b><i>Health care utilization (past 2 years)</i></b> |                      |                 |                          |                          |                               |                 |
| Family physician outpatient MH visits, n(%)          |                      |                 |                          |                          |                               |                 |
| 0                                                    | 65,786 (45.8)        | 17,270 (54.7)   | 48,516 (43.3)            | 1,457 (30.6)             | 454 (20.4)                    | 5,643 (32.0)    |
| 1                                                    | 21,829 (15.2)        | 4,085 (12.9)    | 17,744 (15.8)            | 733 (15.4)               | 312 (14.0)                    | 2,837 (16.1)    |
| 2                                                    | 12,682 (8.8)         | 2,156 (6.8)     | 10,526 (9.4)             | 490 (10.3)               | 267 (12.0)                    | 1,954 (11.1)    |
| ≥3                                                   | 43,365 (30.2)        | 8,081 (25.6)    | 35,284 (31.5)            | 2,085 (43.8)             | 1,189 (53.5)                  | 7,209 (40.9)    |

Urgent outpatient care following mental health ED visits – Online Supplement

|                                                 |     |                |               |                |              |              |               |
|-------------------------------------------------|-----|----------------|---------------|----------------|--------------|--------------|---------------|
| Family physician outpatient non-MH visits, n(%) | 0   | 16,412 (11.4)  | 4,840 (15.3)  | 11,572 (10.3)  | 875 (18.4)   | 253 (11.4)   | 1,908 (10.8)  |
|                                                 | 1   | 12,883 (9.0)   | 3,382 (10.7)  | 9,501 (8.5)    | 524 (11.0)   | 192 (8.6)    | 1,625 (9.2)   |
|                                                 | 2   | 12,282 (8.5)   | 3,124 (9.9)   | 9,158 (8.2)    | 471 (9.9)    | 206 (9.3)    | 1,538 (8.7)   |
|                                                 | ≥3  | 102,085 (71.1) | 20,246 (64.1) | 81,839 (73.0)  | 2,895 (60.8) | 1,571 (70.7) | 12,572 (71.3) |
| Psychiatrist outpatient visits, n(%)            | 0   | 112,449 (78.3) | 26,669 (84.4) | 85,780 (76.5)  | 1,933 (40.6) | 723 (32.5)   | 12,542 (71.1) |
|                                                 | 1-2 | 11,712 (8.15)  | 2,188 (6.92)  | 9,524 (8.50)   | 649 (13.6)   | 339 (15.3)   | 1,911 (10.8)  |
|                                                 | ≥3  | 19,501 (13.6)  | 2,735 (8.7)   | 16,766 (15.0)  | 2,183 (45.8) | 1,160 (52.2) | 3,190 (18.1)  |
| Psychiatric ED visits, n(%)                     | 0-2 | 138,016 (96.1) | 29,981 (94.9) | 108,035 (96.4) | 4,026 (84.5) | 1,962 (88.3) | 17,052 (96.7) |
|                                                 | 3-9 | 5,033 (3.5)    | 1,382 (4.4)   | 3,651 (3.3)    | 648 (13.6)   | 234 (10.5)   | 540 (3.1)     |
|                                                 | ≥10 | 613 (0.4)      | 229 (0.7)     | 384 (0.3)      | 91 (1.9)     | 26 (1.2)     | 51 (0.3)      |
| Psychiatric admissions, n(%)                    | ≥1  | 11,637 (8.1)   | 2,054 (6.5)   | 9,583 (8.6)    | 1,883 (39.5) | 726 (32.7)   | 1,742 (9.9)   |

\*Neighbourhood level

MH=Mental health
